# Supplementary material for: Dimensionality reduction induced synergetic optimization of the thermoelectric properties in Bi2Si2X6 (X = Se, Te) monolayers
Source: Royal Society of Chemistry journal article supplement (doi:10.1039/d3cp02479b), 2023-01-01
Supplement: d3cp02479b1.pdf [file d3cp02479b1.pdf]

# Supporting Information

## Dimensionality reduction induced synergetic optimization of the thermoelectric properties in $\text{Bi}_2\text{Si}_2\text{X}_6$ (X=Se, Te) monolayers

Tingting Zhang<sup>a</sup>, Suiting Ning<sup>a</sup>, Ziye Zhang<sup>a</sup>, Ning Qi<sup>a</sup>, and Zhiquan Chen<sup>\*a</sup>

<sup>a</sup>*Hubei Nuclear Solid Physics Key Laboratory, Department of Physics,*

*Wuhan University, Wuhan 430072, China*

\* E-mail: [chenzq@whu.edu.cn](mailto:chenzq@whu.edu.cn)

Table S1: The optimized lattice constants of bulk  $\text{Bi}_2\text{Si}_2\text{Te}_6$ .

|                                     |       | PBE    | PBEsol | D2     | D3     | experiment |
|-------------------------------------|-------|--------|--------|--------|--------|------------|
| $\text{Bi}_2\text{Si}_2\text{Te}_6$ | a (Å) | 7.380  | 7.280  | 7.216  | 7.345  | 7.270      |
|                                     | c (Å) | 23.594 | 21.243 | 21.591 | 21.738 | 21.343     |

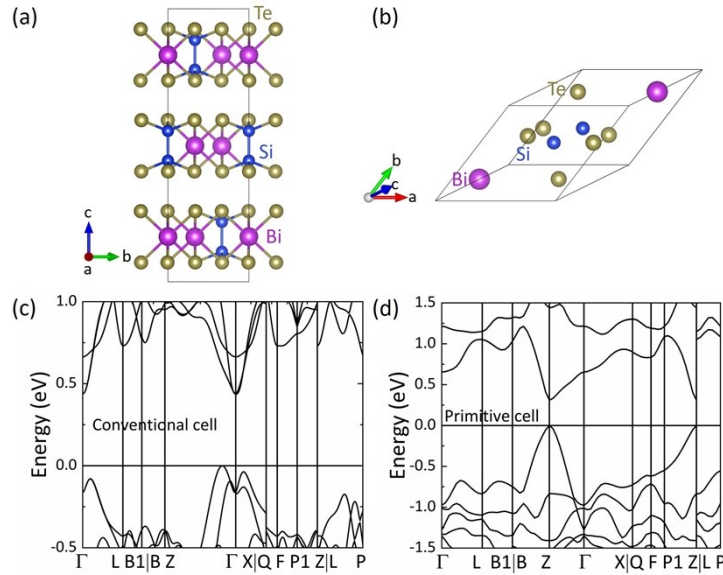

Figure S1. (a) Conventional and (b) primitive cell structures of  $\text{Bi}_2\text{Si}_2\text{Te}_6$ , and band structure of  $\text{Bi}_2\text{Si}_2\text{Te}_6$  with (c) conventional cell structure and (d) primitive cell structure.

Table S2: The elastic constants of bulk and monolayer  $\text{Bi}_2\text{Si}_2\text{X}_6$  (X=Se, Te) (unit: GPa).

|                                     |      | C11   | C12   | C13   | C33   | C44   | C66   |
|-------------------------------------|------|-------|-------|-------|-------|-------|-------|
|                                     |      | (C22) |       | (C23) |       | (C55) |       |
| $\text{Bi}_2\text{Si}_2\text{Se}_6$ | Bulk | 69.75 | 26.28 | 8.18  | 16.73 | 5.21  | 21.73 |
|                                     | ML   | 19.00 | 7.09  | 0.28  | 0.50  | 0.88  | 6.03  |
| $\text{Bi}_2\text{Si}_2\text{Te}_6$ | Bulk | 55.05 | 17.19 | 10.01 | 19.06 | 9.81  | 18.93 |
|                                     | ML   | 15.33 | 4.50  | -0.07 | 0.01  | 0.20  | 5.25  |

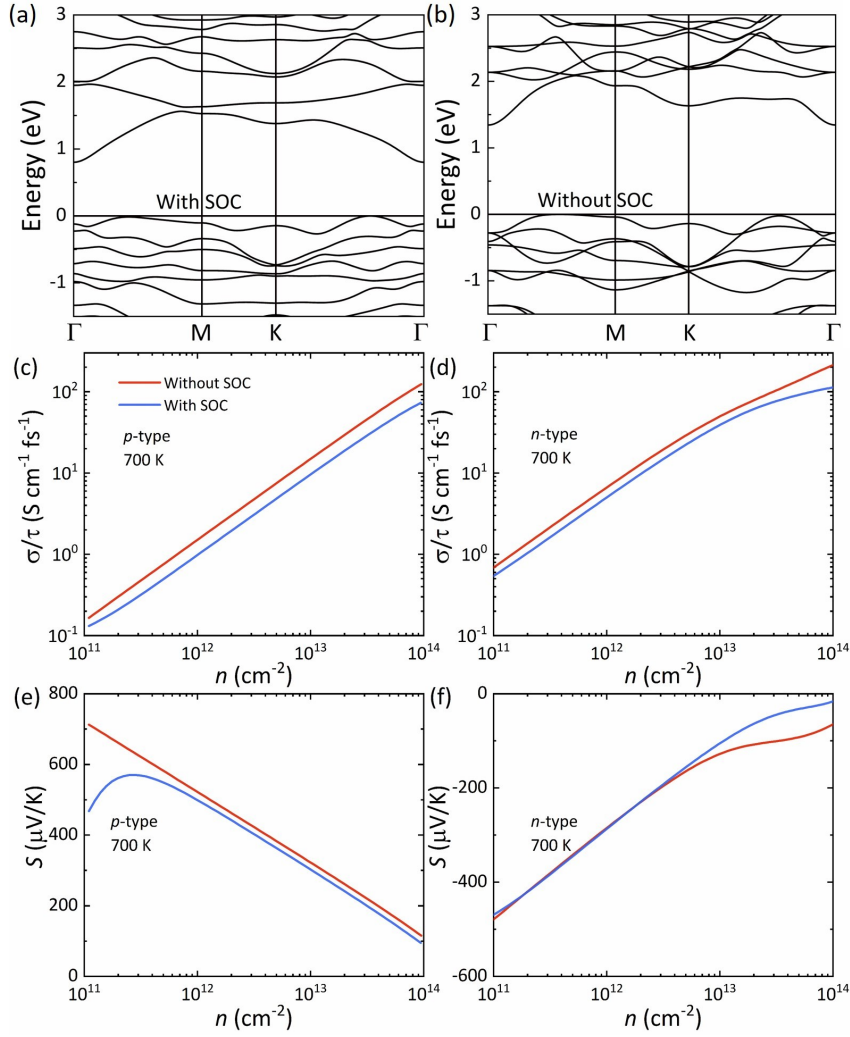

Figure S2: The calculated band structures of monolayer  $\text{Bi}_2\text{Si}_2\text{Te}_6$  (a) with SOC and (b) without SOC, ratio of electrical conductivity to carrier relaxation time and Seebeck coefficient for (c and e) p-type and (d and f) n-type monolayer  $\text{Bi}_2\text{Si}_2\text{Te}_6$  at 700 K.

### The effect of SOC on electronic structure and electronic properties:

In Figure S2 (a) and (b), the calculated band gaps of monolayer  $\text{Bi}_2\text{Si}_2\text{Te}_6$  with and without SOC are 0.80 and 1.34 eV, respectively. For the p-type monolayer  $\text{Bi}_2\text{Si}_2\text{Te}_6$ , ratio of electrical conductivity to carrier relaxation time  $\sigma/\tau$  and Seebeck coefficient  $S$  without SOC effect are larger than that with SOC, which will overestimate its TE performance. For the n-type monolayer  $\text{Bi}_2\text{Si}_2\text{Te}_6$  without SOC,  $\sigma/\tau$  is also higher, while  $S$  is almost consistent at low concentration and has a difference at high concentration.

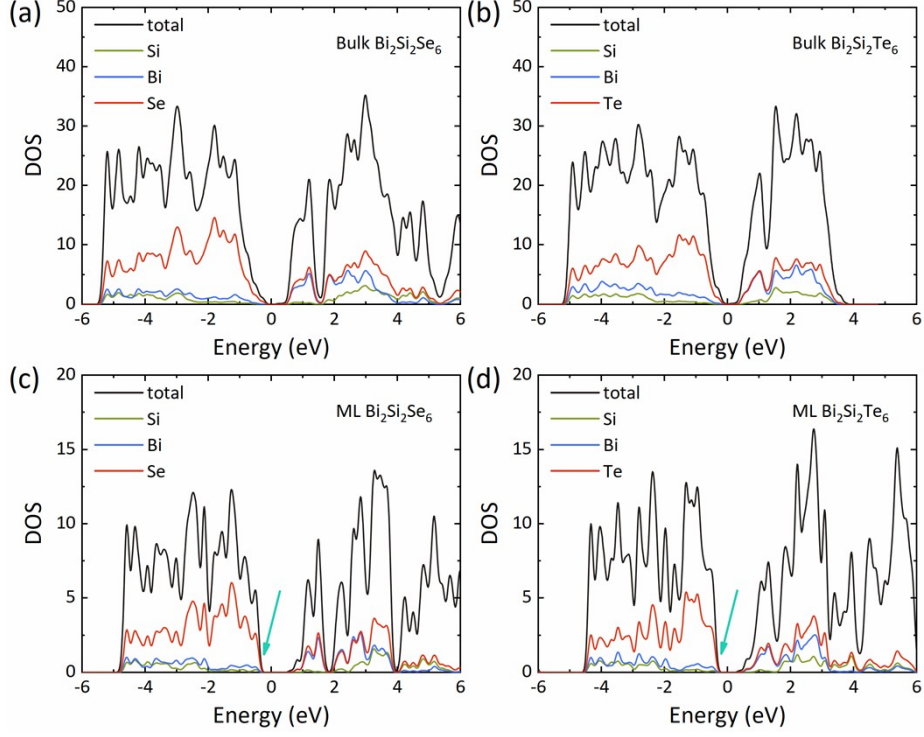

Figure S3: The density of states (DOS) of (a) bulk  $\text{Bi}_2\text{Si}_2\text{Se}_6$ , (b) bulk  $\text{Bi}_2\text{Si}_2\text{Te}_6$ , (c) monolayer  $\text{Bi}_2\text{Si}_2\text{Se}_6$  and (d) monolayer  $\text{Bi}_2\text{Si}_2\text{Te}_6$ .

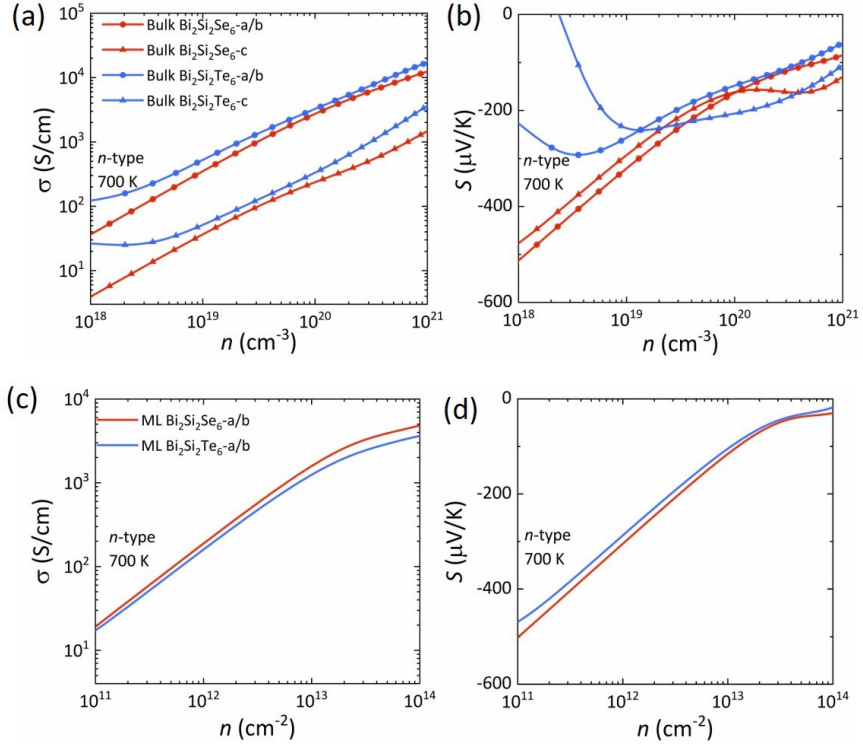

Figure S4: The (a and c) electrical conductivity and (b and d) Seebeck coefficient for the n-type bulk and monolayer  $\text{Bi}_2\text{Si}_2\text{X}_6$  at 700 K.

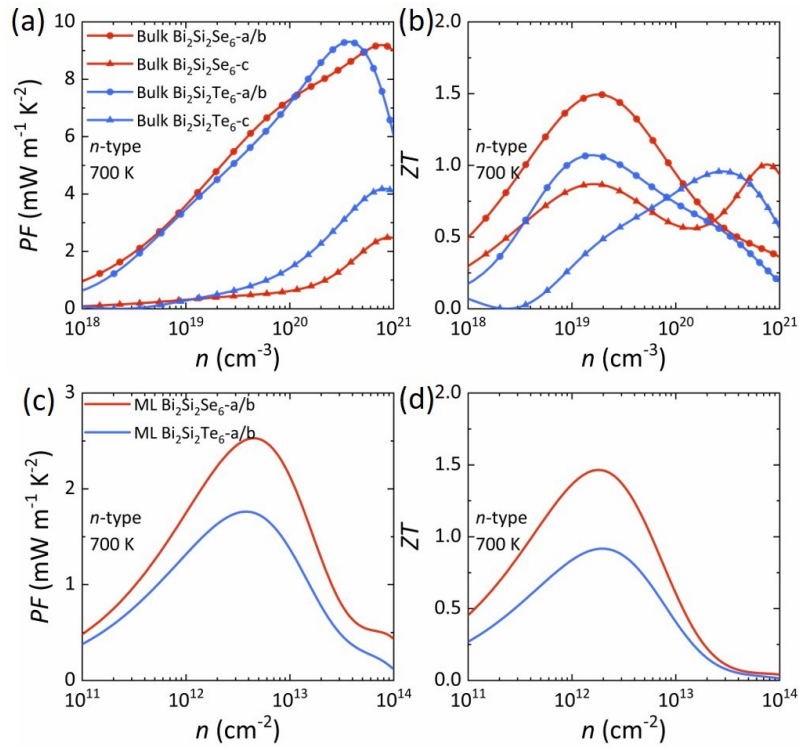

Figure S5: The (a and c) power factor and (b and d) dimensionless figure of merit for the n-type bulk and monolayer  $\text{Bi}_2\text{Si}_2\text{X}_6$  at 700 K.

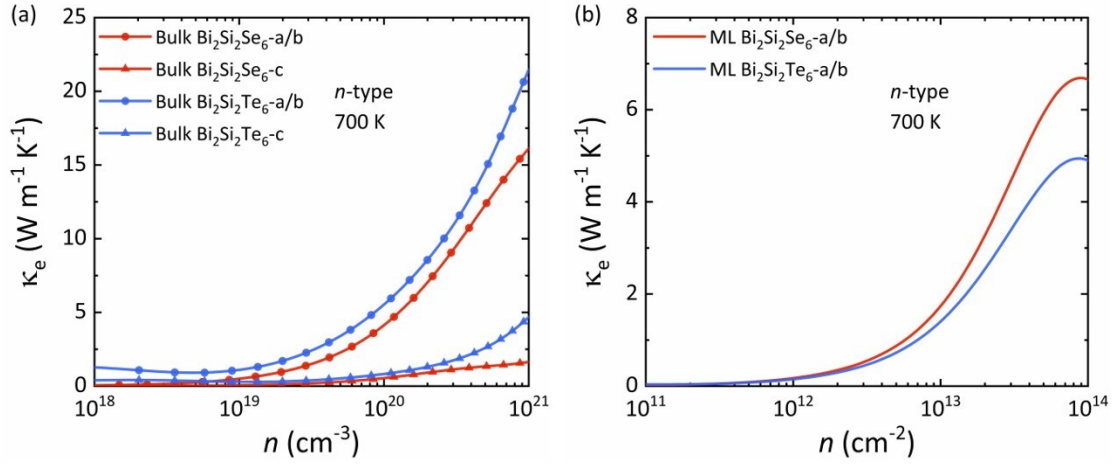

Figure S6: The electronic thermal conductivity of n-type (a) bulk and (b) monolayer  $\text{Bi}_2\text{Si}_2\text{X}_6$  at 700 K.

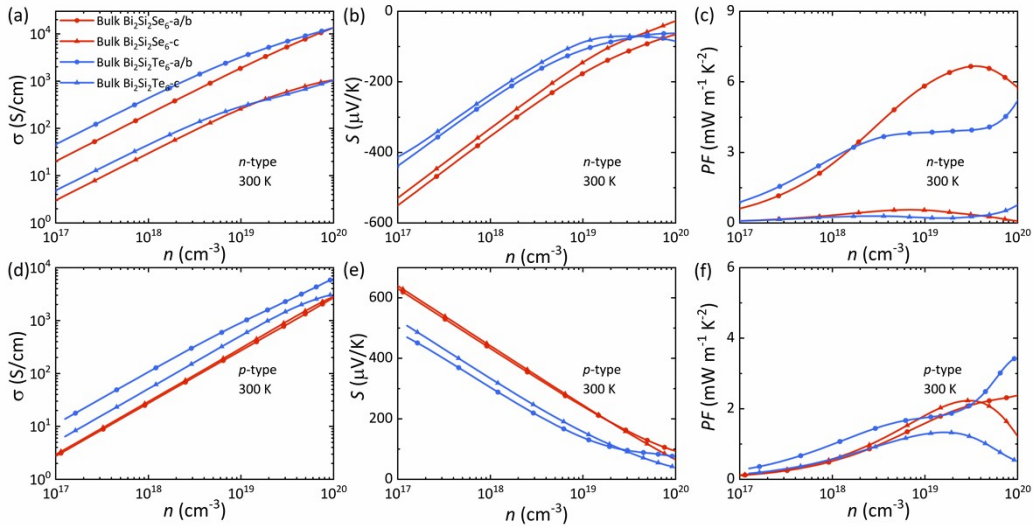

Figure S7: The (a and d) electrical conductivity, (b and e) Seebeck coefficient and (c and f) power factor for the n- and p-type bulk  $\text{Bi}_2\text{Si}_2\text{X}_6$  at 300 K.

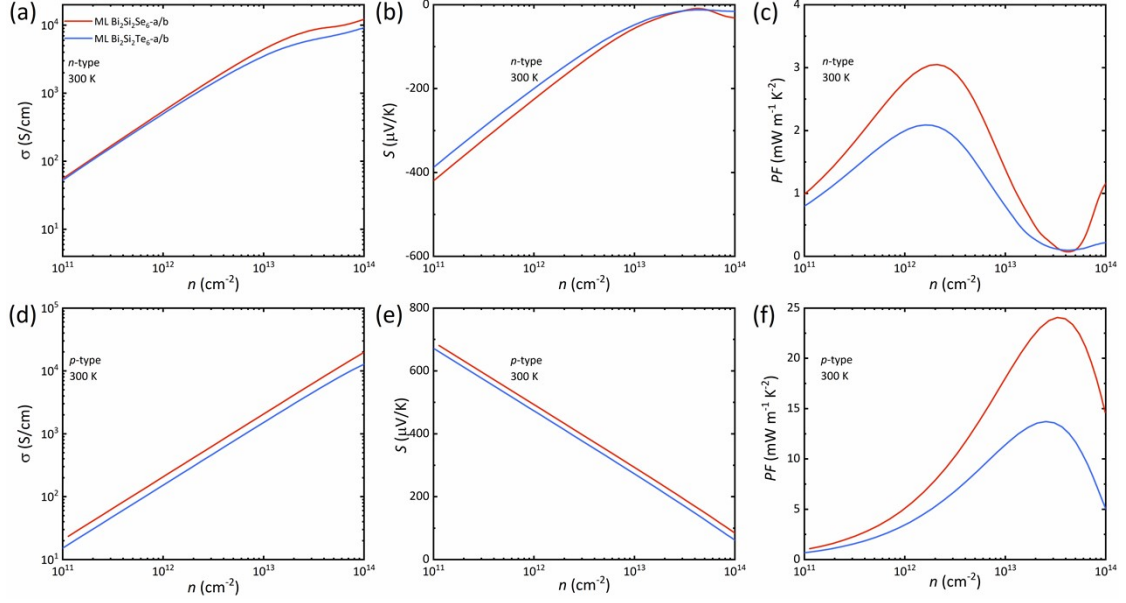

Figure S8: The (a and d) electrical conductivity, (b and e) Seebeck coefficient and (c and f) power factor for the n- and p-type monolayer  $\text{Bi}_2\text{Si}_2\text{X}_6$  at 300 K.

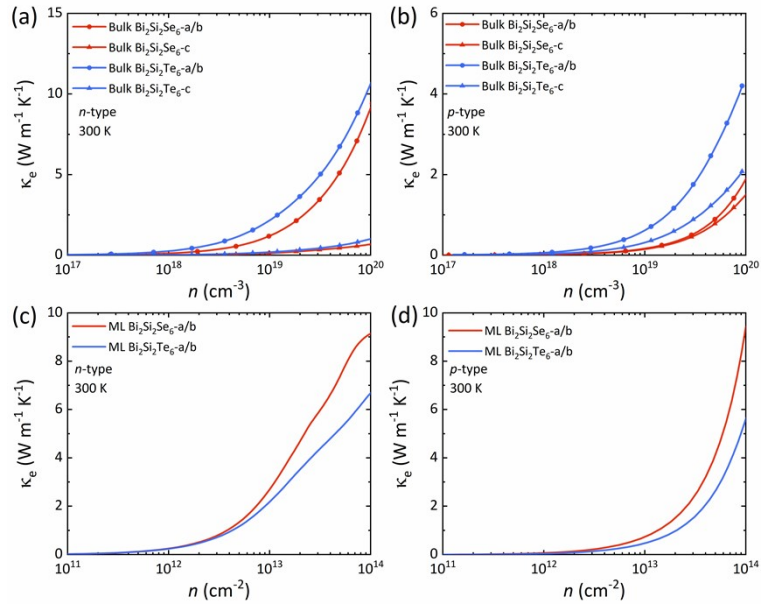

Figure S9: The electronic thermal conductivity of (a) n- and (b) p-type bulk, and (c) n- and (d) p-type monolayer  $\text{Bi}_2\text{Si}_2\text{X}_6$  at 300 K.

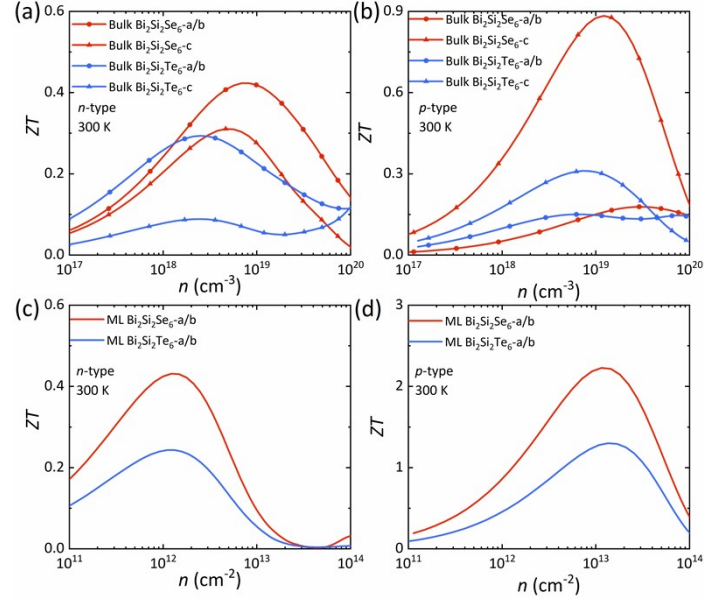

Figure S10: The dimensionless figure of merit of (a) n- and (b) p-type bulk, and (c) n- and (d) p-type monolayer  $\text{Bi}_2\text{Si}_2\text{X}_6$  at 300 K.

Table S3: The predicted Debye temperature ( $\theta_D:K$ ), phonon group velocities ( $\text{km s}^{-1}$ ) in each mode ( $v_l$  for longitudinal acoustic phonon mode,  $v_t$  for transverse acoustic phonon mode), and average phonon group velocity  $v_m$  ( $\text{km s}^{-1}$ ) of bulk and monolayer  $\text{Bi}_2\text{Si}_2\text{X}_6$  ( $X=\text{Se, Te}$ ).

|                                     |      | $\theta_D$ | $v_l$ | $v_t$ | $v_m$ |
|-------------------------------------|------|------------|-------|-------|-------|
| $\text{Bi}_2\text{Si}_2\text{Se}_6$ | Bulk | 151.2      | 2.48  | 1.37  | 1.53  |
|                                     | ML   | 84.8       | 1.97  | 1.18  | 1.31  |
| $\text{Bi}_2\text{Si}_2\text{Te}_6$ | Bulk | 142.2      | 2.37  | 1.37  | 1.52  |
|                                     | ML   | 61.0       | 1.50  | 0.89  | 0.99  |
